# Supplementary material
Source: publisher figshare collection journal article supplement (https://gsajournals.figshare.com/articles/dataset/_/23915967)
Supplement: Supplementary file 1 [file 2]

## Sheet: ufmu_alleles
											Gene Normalized Read Count										Transcript Assembly Transcript Structure - Figure 3A
						Genotyping Primers		RNA-seq Transcriptome Data			Mutant			W22 Control			Differential Expression
TF Name	W22 gid	Mutant Allele	Mu ID	UFMu Stock	Pos.	F_ID	R_ID	Pedi.	Tissue	Illumina	FPKM	CPM	N	FPKM	CPM	N	log2fc	lfcSE	p-value	DE	5' of Mu	3' of Mu
BAF60.21	Zm00004b012791	baf60.21-m1	mu1034781	UFMu-03236	5' UTR	BAF60.21-F3	BAF60.21-R3	BC2S2	tassel_stem	PE150	45.6024	37.4852	3	32.7948	26.9573	3	0.479975	0.113925	0.000822	Not_DE	NA	Mu TSS
BAF60.21	Zm00004b012791	baf60.21-m2	mu1092086	UFMu-11153	CDS	BAF60.21-F3	BAF60.21-R3	BC2S2	tassel_stem	PE150	18.5199	15.2234	3	32.7948	26.9573	3	-0.829254	0.11796	1.16e-09	Not_DE	NA	Mu TSS
BSD10	Zm00004b040474	bsd10-m2	mu1072546	UFMu-03453	5' UTR	BSD8-F1	BSD8-R1	S2	imbibed_embryo	PE150	12.6187	22.7894	3	16.19	29.2391	4	-0.437964	0.108484	0.000486	Not_DE	NA	Mu TSS
BZIP76	Zm00004b029476	bzip76-m2	mu1083967	UFMu-10010	Intron	bZIP76-F5	bZIP76-R5	BC2S2	imbibed_embryo	PE150	4.31176	7.9164	3	4.03725	7.4124	4	0.0643942	0.217021	0.90064	Not_DE	NA	Mu TSS
BZIP76	Zm00004b029476	bzip76-m3	mu1081677	UFMu-09463	Intron	bZIP76-F6	bZIP76-R6	BC2S2	imbibed_embryo	PE150	2.06877	3.79826	3	4.03725	7.4124	4	-0.954107	0.236572	0.00109819	Not_DE	NA	gene exon partial
C3H42	Zm00004b024707	c3h42-m1	mu1068676	UFMu-08608	Intron	C3H42-F1	C3H42-R1	BC2S2	tassel_stem	PE150	7.19516	5.051	3	5.30857	3.72662	3	0.442765	0.172669	0.0628306	Not_DE	gene TSS-Mu	Mu TSS
E2F13	Zm00004b023063	e2f13-m1	mu1086360	UFMu-11121	CDS	ump020	ump104	S3	coleoptile_tip	PE150	3.1496	5.77008	3	4.85591	8.89603	4	-0.60661	0.158796	0.00362205	Not_DE	gene TSS-Mu	Mu TSS
E2F19	Zm00004b000391	e2f19-m1	mu1040458	UFMu-04300; UFMu-13849	5' UTR	E2F19-F2	E2F19-R1	BC2S2	seedling_leaf	PE150	2.43213	4.1322	3	5.42953	9.22477	4	-1.12518	0.216671	8.47e-06	DE_Down	NA	gene exon partial
E2F19	Zm00004b000391	e2f19-m2	mu1080409	UFMu-09504	5' UTR	E2F19-F2	E2F19-R1	BC2S2	seedling_leaf	PE150	4.01317	6.81838	3	5.42953	9.22477	4	-0.471017	0.203147	0.112914	Not_DE	NA	gene exon partial
GRAS52	Zm00004b006535	gras52-m1	mu1037818	UFMu-03743	CDS	ump190	ump191	S3	imbibed_embryo	PE150	0.383592	0.718085	2	6.58857	12.3338	4	-4.07161	0.354878	4.83e-28	DE_Down	gene TSS-Mu	gene exon partial
GRAS75	Zm00004b009784	gras75-m1	mu1080849	UFMu-09435	CDS	ump173	ump174	S2	imbibed_embryo	PE150	32.4921	54.0993	3	78.3635	130.475	4	-1.26579	0.141772	4.06e-17	DE_Down	gene TSS-Mu	NA
HSF13	Zm00004b000433	hsf13-m1	mu1085337	UFMu-10587	CDS	ump188	ump189	S3	seedling_leaf	PE150	31.2444	45.5231	3	63.5091	92.5328	4	-0.989074	0.11017	4.03e-17	Not_DE	gene TSS-Mu	Mu TSS
HSF18	Zm00004b013608	hsf18-m1	mu1086526	UFMu-10749	CDS	ump056	ump139	S3	imbibed_embryo	PE150	5.39526	7.68825	3	1.98332	2.82623	4	1.37295	0.289645	2.9e-05	DE_Up	gene TSS partial	Mu TSS
HSF20	Zm00004b040094	hsf20-m1	mu1085720	UFMu-10752	CDS	ump210	ump211	S3	imbibed_embryo	PE150	0.7051	0.887721	3	0.486205	0.612132	4	0.514161	0.691733	0.633014	Not_DE	gene TSS-Mu	gene exon partial
HSF24	Zm00004b004268	hsf24-m3	mu1065831	UFMu-08727	5' UTR	HSF24-F5	HSF24-R5	BC2S2	tassel	SE50	21.0283	51.2249	3	16.894	41.1537	3	0.04495	0.168313	0.873309	Not_DE	gene TSS-Mu	gene exon partial
HSF24	Zm00004b004268	hsf24-m4	mu1037205	UFMu-03655	CDS	HSF24-F5	HSF24-R5	BC2S2	tassel	SE50	8.7178	21.2366	3	16.894	41.1537	3	-1.10358	0.171713	9.37e-09	DE_Down	NA	gene exon partial
HSF29	Zm00004b013825	hsf29-m1	mu1023451	UFMu-02314	5' UTR	ump194	ump195	S3	imbibed_embryo	PE150	17.7796	32.75	3	15.1099	27.8325	4	0.200584	0.168239	0.441451	Not_DE	NA	Mu TSS
HSF29	Zm00004b013825	hsf29-m2	mu1083642	UFMu-10398	CDS	ump194	ump195	S3	imbibed_embryo	PE150	15.1709	27.9449	3	15.1099	27.8325	4	-0.0251099	0.168794	0.936008	Not_DE	NA	gene exon partial
HSF6	Zm00004b013941	hsf6-m1	mu1048425	UFMu-06347	CDS	ump067	ump149	S3	imbibed_embryo	PE150	0.0150157	0.035452	3	0.204105	0.481891	4	-3.74849	1.24493	0.015786	DE_Down	NA	NA
HSF6	Zm00004b013941	hsf6-m2	mu1056797	UFMu-07611	CDS	ump068	ump150	S2	imbibed_embryo	PE150	0.144497	0.341157	3	0.204105	0.481891	4	-0.47914	0.771504	0.728183	Not_DE	NA	NA
JMJ13	Zm00004b023587	jmj13-m4	mu1081210	UFMu-09466	CDS	JMJ13-F7	JMJ13-R7	BC2S2	tassel_stem	PE150	4.23719	8.90234	3	6.73036	14.1405	3	-0.66912	0.133445	0.000113	Not_DE	gene TSS-Mu	Mu TSS
JMJ13	Zm00004b023587	jmj13-m7	mu1041192	UFMu-04767	5' UTR	JMJ13-F9	JMJ13m7-R9	BC2S2	tassel_stem	PE150	7.54192	15.8456	3	6.73036	14.1405	3	0.162025	0.128038	0.600443	Not_DE	NA	Mu TSS
MYB40	Zm00004b016719	myb40-m1	mu1090929	UFMu-11189	Intron	MYB40-F1	MYB40-R3	BC2S2	coleoptile_tip	PE150	7.94744	13.1689	3	6.98126	11.568	4	0.183644	0.147431	0.897943	Not_DE	gene TSS-Mu	Mu TSS
MYB40	Zm00004b016719	myb40-m2	mu1043293	UFMu-04991	Intron	MYB40-F2	MYB40-R2	BC2S2	coleoptile_tip	PE150	5.28893	8.76375	3	6.98126	11.568	4	-0.37154	0.150537	0.34221	Not_DE	NA	gene exon partial
MYBR21	Zm00004b024904	mybr21-m1	mu1042351	UFMu-04838	CDS	ump060	ump143	S3	imbibed_embryo	PE150	4.55712	14.2911	3	19.424	60.9136	4	-2.07483	0.128679	1.64e-55	DE_Down	gene TSS-Mu	gene exon partial
MYBR32	Zm00004b002134	mybr32-m1	mu1076168	UFMu-09083	CDS	ump042	ump125	S2	seedling_leaf	PE150	37.4226	61.1859	3	86.661	141.691	4	-1.18706	0.0831046	2.06e-43	DE_Down	gene TSS-Mu	Mu TSS
ORPHAN249	Zm00004b031116	orphan249-m2	mu1029949	UFMu-02921; UFMu-06508	5' UTR	Orph249-F9	Orph249-R9	BC1S2	imbibed_embryo	PE150	7.71158	17.166	3	6.22535	13.8576	4	0.298401	0.238943	0.411451	Not_DE	NA	Mu TSS
SBP20	Zm00004b024383	sbp20-m2	mu1086430	UFMu-10892	CDS	ump083	ump165	S3	imbibed_embryo	PE150	3.55115	9.38925	3	5.30519	14.0269	4	-0.619815	0.160402	0.000808	Not_DE	gene TSS-Mu	Mu TSS
SBP20	Zm00004b024383	sbp20-m3	mu1091327	UFMu-11256	CDS	ump084	ump166	S2	imbibed_embryo	PE150	5.63359	14.8952	3	5.30519	14.0269	4	0.0650992	0.159818	0.824482	Not_DE	gene TSS-Mu	Mu TSS
WRKY2	Zm00004b013450	wrky2-m2	mu1025953	UFMu-11813	CDS	ump065	ump147	S3	coleoptile_tip	PE150	1.2281	2.20567	3	1.27518	2.29022	4	-0.0592967	0.258323	0.986094	Not_DE	gene TSS partial	Mu TSS
WRKY8	Zm00004b023980	wrky8-m1	mu1048159	UFMu-06456	CDS	ump200	ump201	S3	imbibed_embryo	PE150	10.9907	19.2777	3	4.07652	7.15022	4	1.45215	0.294922	2.4e-05	DE_Up	gene TSS-Mu	Mu TSS
WRKY8	Zm00004b023980	wrky8-m2	mu1077370	UFMu-08953	CDS	ump080	ump163	S3	imbibed_embryo	PE150	3.06645	5.37855	3	4.07652	7.15022	4	-0.330204	0.300859	0.512222	Not_DE	gene TSS partial	Mu TSS
WRKY82	Zm00004b031112	wrky82-m1	mu1081611	UFMu-09469	CDS	ump018	ump102	S3	imbibed_embryo	PE150	4.39716	7.18936	3	21.0138	34.3575	4	-2.29744	0.261948	8.04e-17	DE_Down	gene TSS-Mu	NA
WRKY87	Zm00004b023521	wrky87-m1	mu1067257	UFMu-08437	CDS	ump059	ump142	S3	imbibed_embryo	PE150	3.39253	8.83076	3	2.3016	5.99108	4	0.534776	0.252286	0.107159	Not_DE	gene TSS-Mu	Mu TSS
WRKY87	Zm00004b023521	wrky87-m2	mu1091217	UFMu-12044	CDS	ump058	ump141	S3	imbibed_embryo	PE150	3.39554	8.83858	3	2.3016	5.99108	4	0.571386	0.25249	0.0738679	Not_DE	gene TSS-Mu	Mu TSS
